# Supplementary material for: Thiophene-Based Covalent Triazine Frameworks as Visible-Light-Driven Heterogeneous Photocatalysts for the Oxidative Coupling of Amines
Source: MDPI journal article supplement (doi:10.3390/molecules29071637), 2024-04-05
Supplement: s1 [file s1]

Supporting Information

**Thiophene based-Covalent Triazine Frameworks as Visible-light Driven Heterogeneous Photocatalysts for the Oxidative Coupling of Amines**

M. Melero, U. Díaz\*, F.X. Llabrés i Xamena\*

*Instituto de Tecnología Química, Universitat Politècnica de València, Agencia Estatal Consejo Superior de Investigaciones Científicas, 46022 Valencia, Spain.*

*E-mail: [udiaz@itq.upv.es](mailto:udiaz@itq.upv.es); [fllabres@itq.upv.es](mailto:fllabres@itq.upv.es)*

## Contents

### *Characterization data*

|                                                                         |     |
|-------------------------------------------------------------------------|-----|
| Synthesis of CTF-type materials .....                                   | 3-4 |
| Table S1. Elemental analysis of catalyst .....                          | 4   |
| Figure S1 and S2, XRD patterns of CTF-type materials .....              | 5   |
| Figure S3 and S4. TG analysis experiments of CTF-type materials .....   | 6   |
| Figure S5. CO <sub>2</sub> adsorption isotherm of TP-CTF material ..... | 6   |

## Synthesis of CTF-type materials

### CTF's synthesis

To a Schlenk flask tube with vacuum valve, 1,3,5-tris(4-formylphenyl)benzene (0.57 mmol, 1 eq) and 4',4''-(1,3,5-triazine-2,4,6-triyl)trianiline (0.57 mmol, 1 eq) were added, followed by o-dichlorobenzene:ethanol:DMSO (2:1.8:0.2, 10.0 mL) along the walls of the flask (to push down any remaining solids atop of the flask), and 6 M acetic acid (1 mL). The flask was sealed and sonicated at room temperature for 10 min. The reaction mixture was then degassed through three freeze-pump-thaw cycles, after which the flask was charged with N<sub>2</sub> through the vacuum valve. The flask was then allowed to stand in a 120°C pre-heated oil bath for three days without stirring. The flask was removed from the oil bath, cooled to room temperature and filtered through a Buchner funnel equipped with a filter paper. The solid was washed with THF (50 mL x 3) and acetone (50 mL x 3) to ensure all of the material is filtered from the flask to the Buchner funnel. The solid was washed in a Soxhlet extractor with THF for 24 h and then was collected and dried at 120°C for 24 h under vacuum.

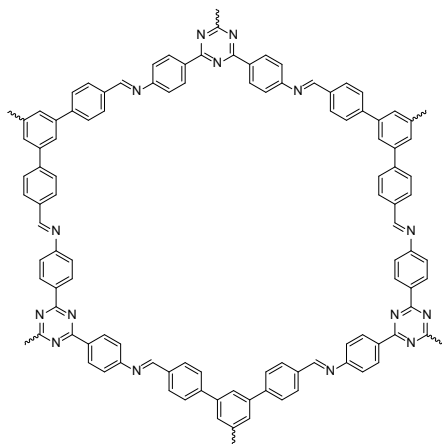

### Me-CTF's synthesis

To a Schlenk flask tube with vacuum valve, 2,5-dimethoxybenzene-1,4-dicarboxaldehyde (0.86 mmol, 1.5 eq) and 4',4''-(1,3,5-triazine-2,4,6-triyl)trianiline (0.57 mmol, 1 eq) were added, followed by o-dichlorobenzene:n-butanol (1:1, 10.0 mL) along the walls of the flask (to push down any remaining solids atop of the flask), and 6 M acetic acid (1 mL). The flask was sealed and sonicated at room temperature for 10 min. The reaction mixture was then degassed through three freeze-pump-thaw cycles, after which the flask was charged with N<sub>2</sub> through the vacuum valve. The flask was then allowed to stand in a 120°C pre-heated oil bath for three days without stirring. The flask was removed from the oil bath, cooled to room temperature and filtered through a Buchner funnel equipped with a filter paper. The solid was washed with THF (50 mL x 3) and acetone (50 mL x 3) to ensure all of the material is filtered from the flask to the Buchner funnel. The solid was washed in a Soxhlet extractor with THF for 24 h and then was collected and dried at 120°C for 24 h under vacuum.

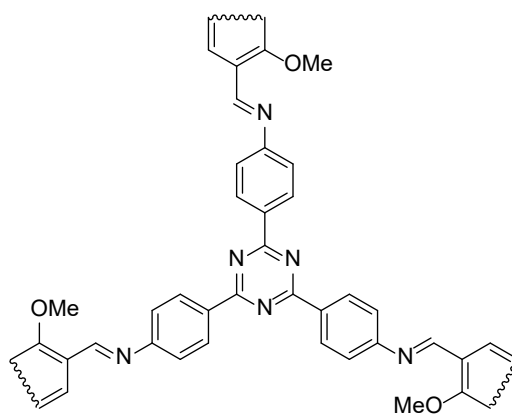

### Elemental analysis of TP-CTF-type materials

**Table S1.** Elemental analysis of TP-CTF

| Catalyst         | N(%) | C(%) | H(%) | S(%) | C:S<br>exp. | C:S<br>calc. | C:N<br>exp. | C:N<br>calc. |
|------------------|------|------|------|------|-------------|--------------|-------------|--------------|
| Fresh TP-CTF     | 12.5 | 65.8 | 3.4  | 14.6 | 12.0        | 12.0         | 6.1         | 6.0          |
| Recovered TP-CTF | 13.0 | 69.1 | 4.3  | 15.0 | 12.0        | 12.3         | 6.1         | 6.2          |

## XRD patterns of CTF-type materials

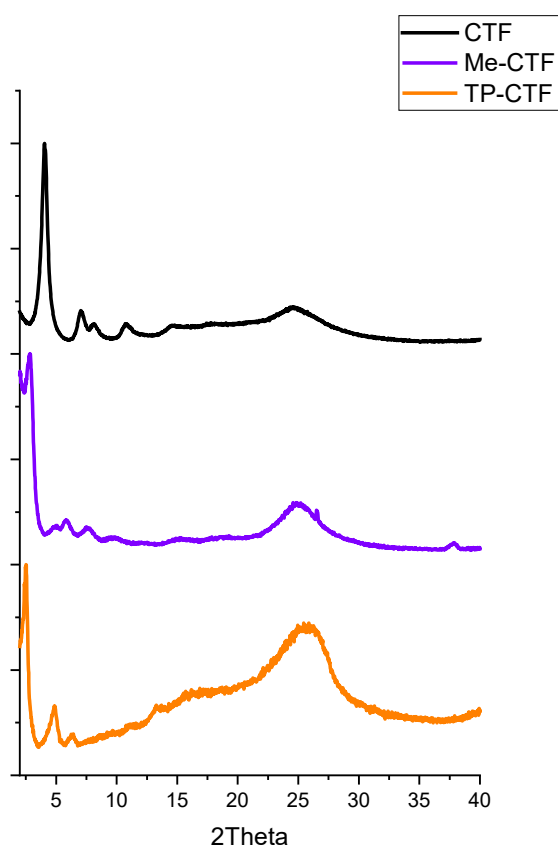

**Figure S1.** XRD patterns of CTF (a), Me-CTF (b) and TP-CTF (c) materials.

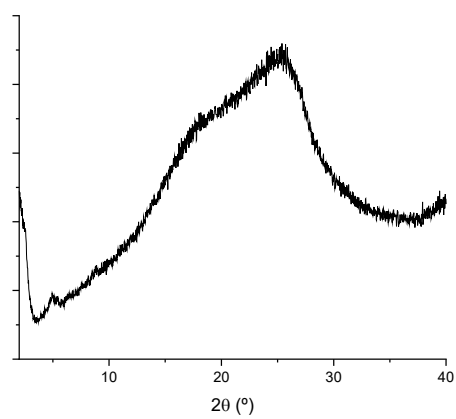

**Figure S2.** XRD pattern of recovered TP-CTF after 1<sup>st</sup> catalytic cycle.

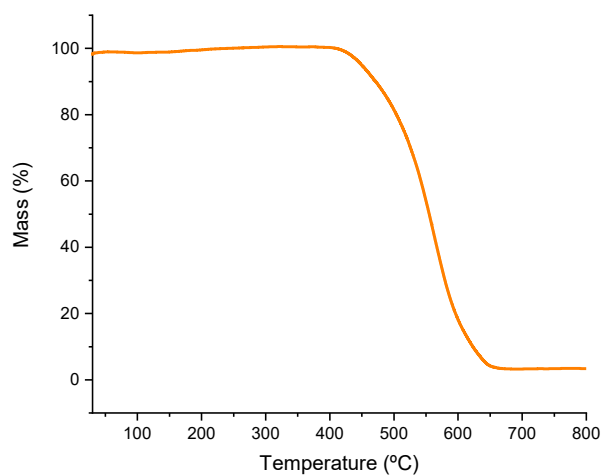

**Figure S3.** TG analysis of TP-CTF material.

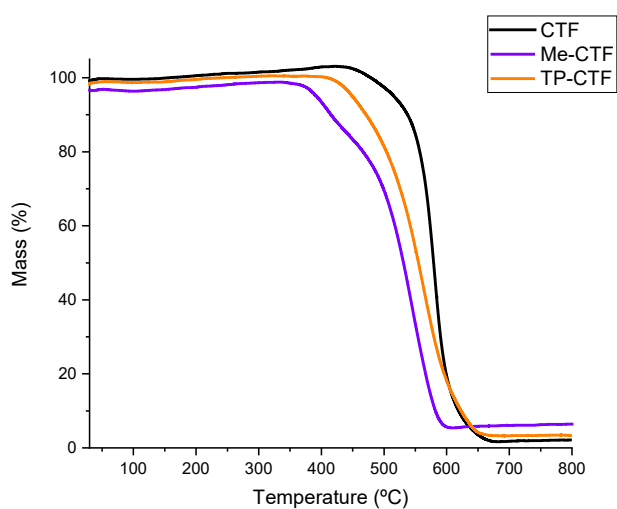

**Figure S4.** Comparative TG analysis of CTF (a), Me-CTF (b) and TP-CTF (c) materials.

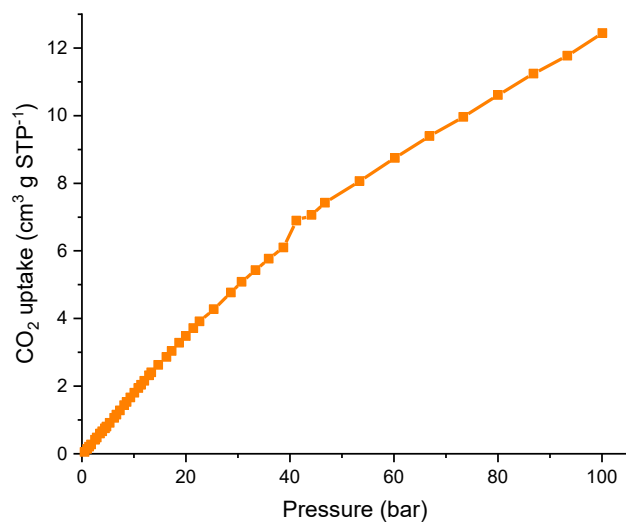

**Figure S5.** CO<sub>2</sub> adsorption isotherm of TP-CTF material.
